# Supplementary material for: Genetically modified macrophages accelerate myelin repair
Source: PubMed Central journal article supplement (PMC9358396; doi:10.15252/emmm.202114759), 2022-07-13
Supplement: EMMM-14-e14759-s010.pdf [file EMMM-14-e14759-s010.pdf]

## APPENDIX-SUPPLEMENTARY DATA

### **Table of content:**

**Appendix Figure S1 and legend:** Scheme illustrating lentiviral vector constructions used in the study

**Appendix Figure S2 and legend:** Viability and proliferation/differentiation following Sema3F transduction in vitro

**Appendix Figure S3 and legend:** Oil Red O staining in chimeric mouse spinal cord sections at 7 days post lesion

**Appendix Figure S4 and legend:** Morphology of GFP+ cells in the spinal cord

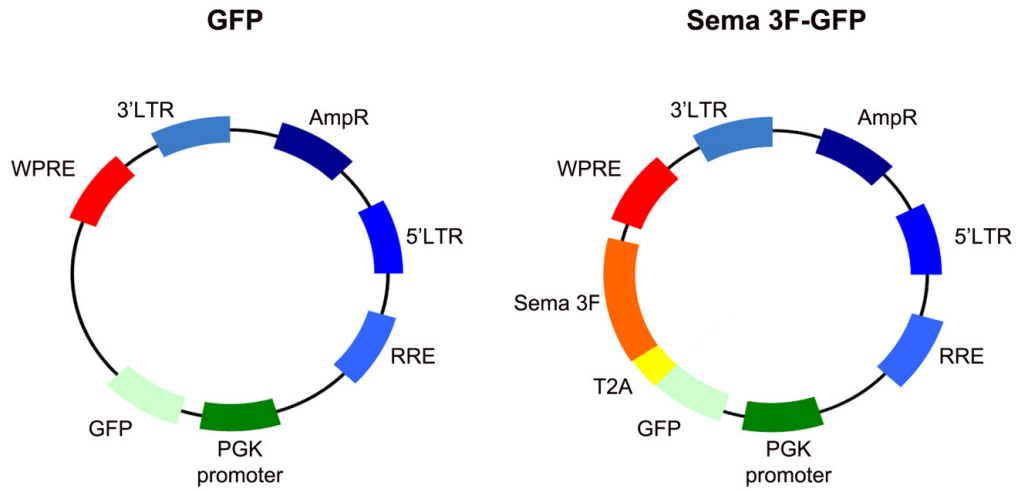

**Appendix Figure S1. Scheme illustrating lentiviral vector constructions used in the study.** WPRE-Woodchuck hepatitis virus Posttranscriptional Regulatory Element; LTR-Long Terminal Repeat; AmpR-Ampicillin Resistance; RRE- Rev Response Element; PGK-PhosphoGlycerate Kinase; GFP-Green Fluorescent protein; Sema-Semaphorin.

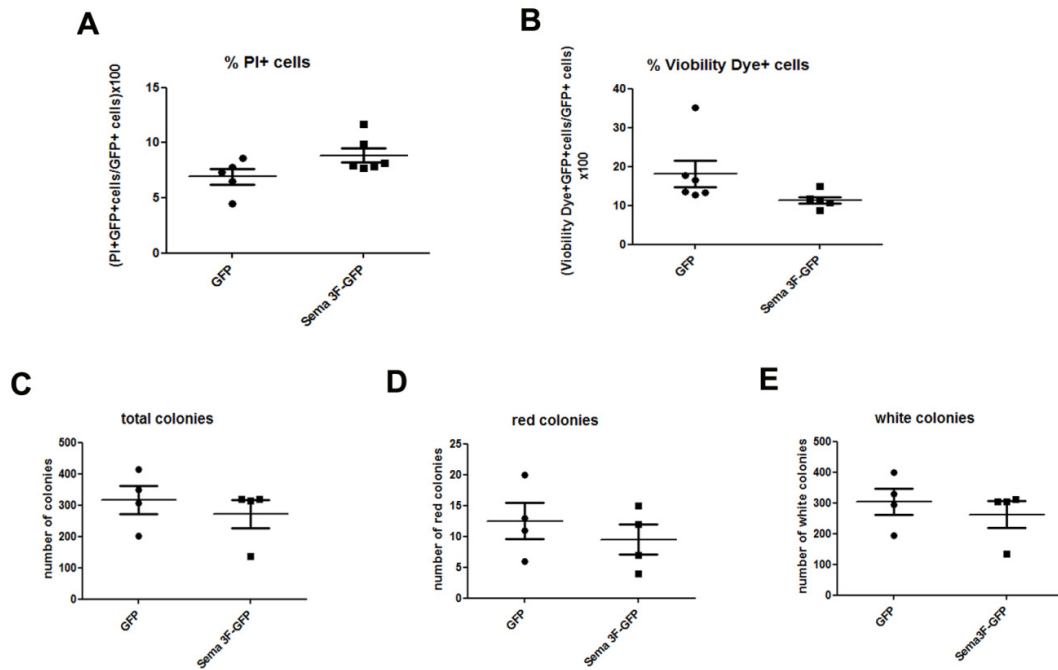

**Appendix Fig S2. Viability and proliferation/differentiation following Semaphorin 3F transduction in vitro.** A-B. Flow cytometry analyses of cell death. Hematopoietic stem/progenitor cell preparation was transduced in vitro using PGK-GFP and PGK-Sema3F-GFP lentiviral vectors and expanded for 5 days. Dead/apoptotic cells were labeled using Propidium Iodide (PI) and Viability 405/520 Fixable Dye. n= 5-6 independent experiments. A. PI labelling. B. Viability Dye labelling. C-E. Colony assay. n = 2 replicates from each of 2 independent experiments. C. Total colonies formed by transduced cell preparations. D. Red colonies formed by transduced cell preparations. E. White colonies formed by transduced cell preparations.

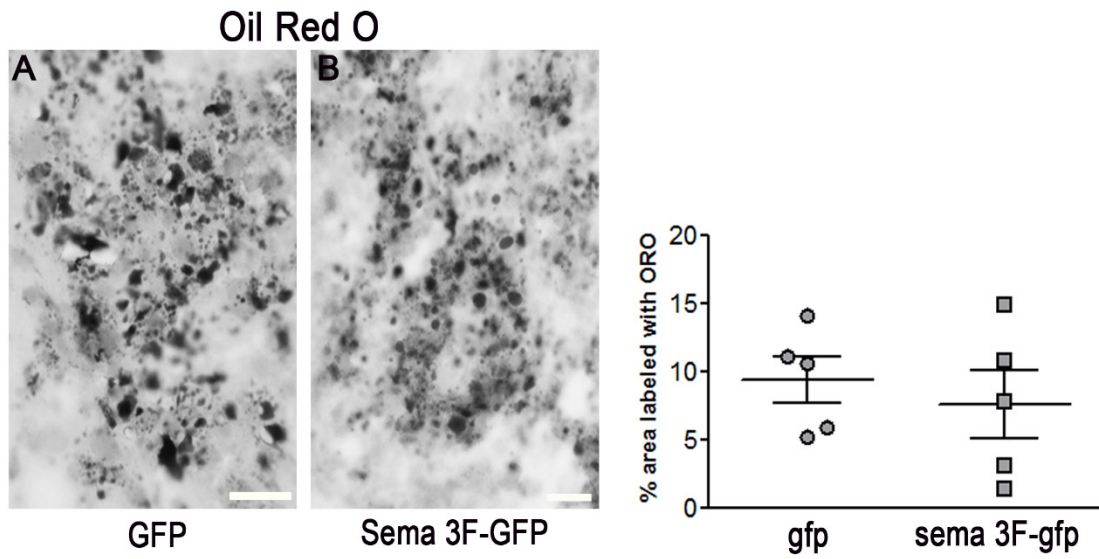

**Appendix Figure S3. Oil Red O staining in chimeric mouse spinal cord sections at 7 days post lesion. A. GFP mouse. B. Sema3F-GFP mouse. C. The extent of labelling is similar between the two groups. n = 5 mice/group. Scale bars = 50  $\mu$ m.**

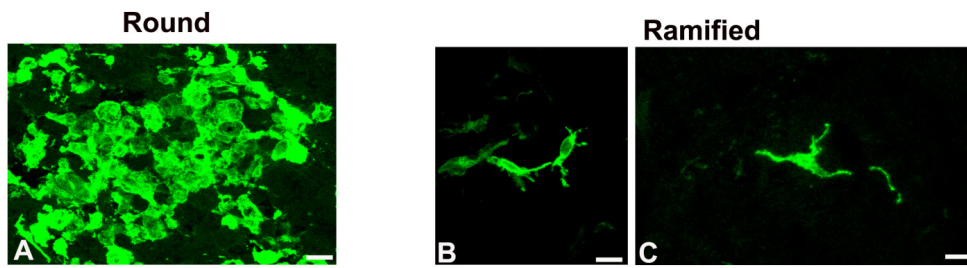

**Appendix Figure S4. Morphology of GFP+ cells in the spinal cord.** A. Large, round cells in a lesion at 7 dpl. B-C. Ramified cells observed in the lesion-neighbouring tissue at 7 and 10 dpl, but also in the lesions at 60 dpl. Scale bars A=20  $\mu\text{m}$ , B=10  $\mu\text{m}$ , and C=10  $\mu\text{m}$ .
